# Supplementary material for: The Response of the Soil Microbiota to Long-Term Mineral and Organic Nitrogen Fertilization is Stronger in the Bulk Soil than in the Rhizosphere
Source: MDPI journal article supplement (doi:10.3390/genes11040456), 2020-04-22
Supplement: s1 [file s1]

*Supplementary information to:*

**The response of the soil microbiota to long term mineral and organic nitrogen fertilization is stronger in the bulk soil than in the rhizosphere**

Massimiliano Cardinale, Stefan Ratering, Aitak Sadeghi, Sushil Pokhrel, Bernd Honermeier, Sylvia Schnell

- Figure S1: UPGMA tree of beta-diversity distances
- Figure S2: Beta-diversity plot of the soil bacterial microbiota, calculated at OTU<sub>97</sub> level, in the two soil habitats, under the four N-fertilization treatments
- Figure S3: OTUs significantly affected by fertilization treatment in the bulk soil
- Table S1: Details of the fertilization treatments
- Table S2: Thermal profiles and primers used for qPCR
- Additional bibliography to Tab. S2

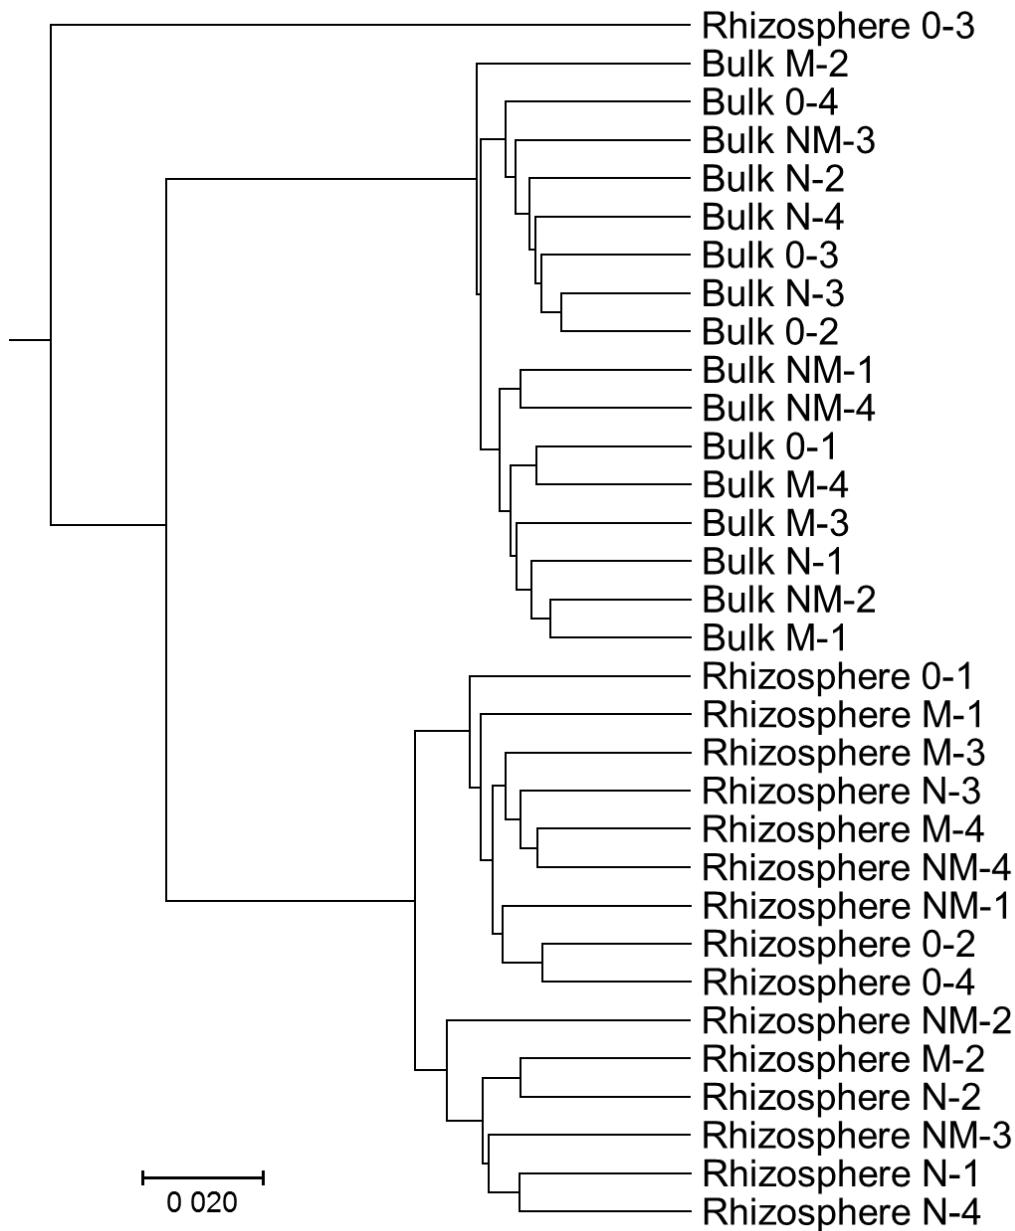

**Figure. S1 UPGMA tree of beta-diversity distances.** UPGMA tree showing the similarity of the taxonomic structure (weighted Unifrac distances) between the microbiotas of the analyzed soil samples (at OTU<sub>97</sub> level). The sample “Rhizosphere 0–3” was removed from the analysis because it clearly did not cluster within the universe of the data.

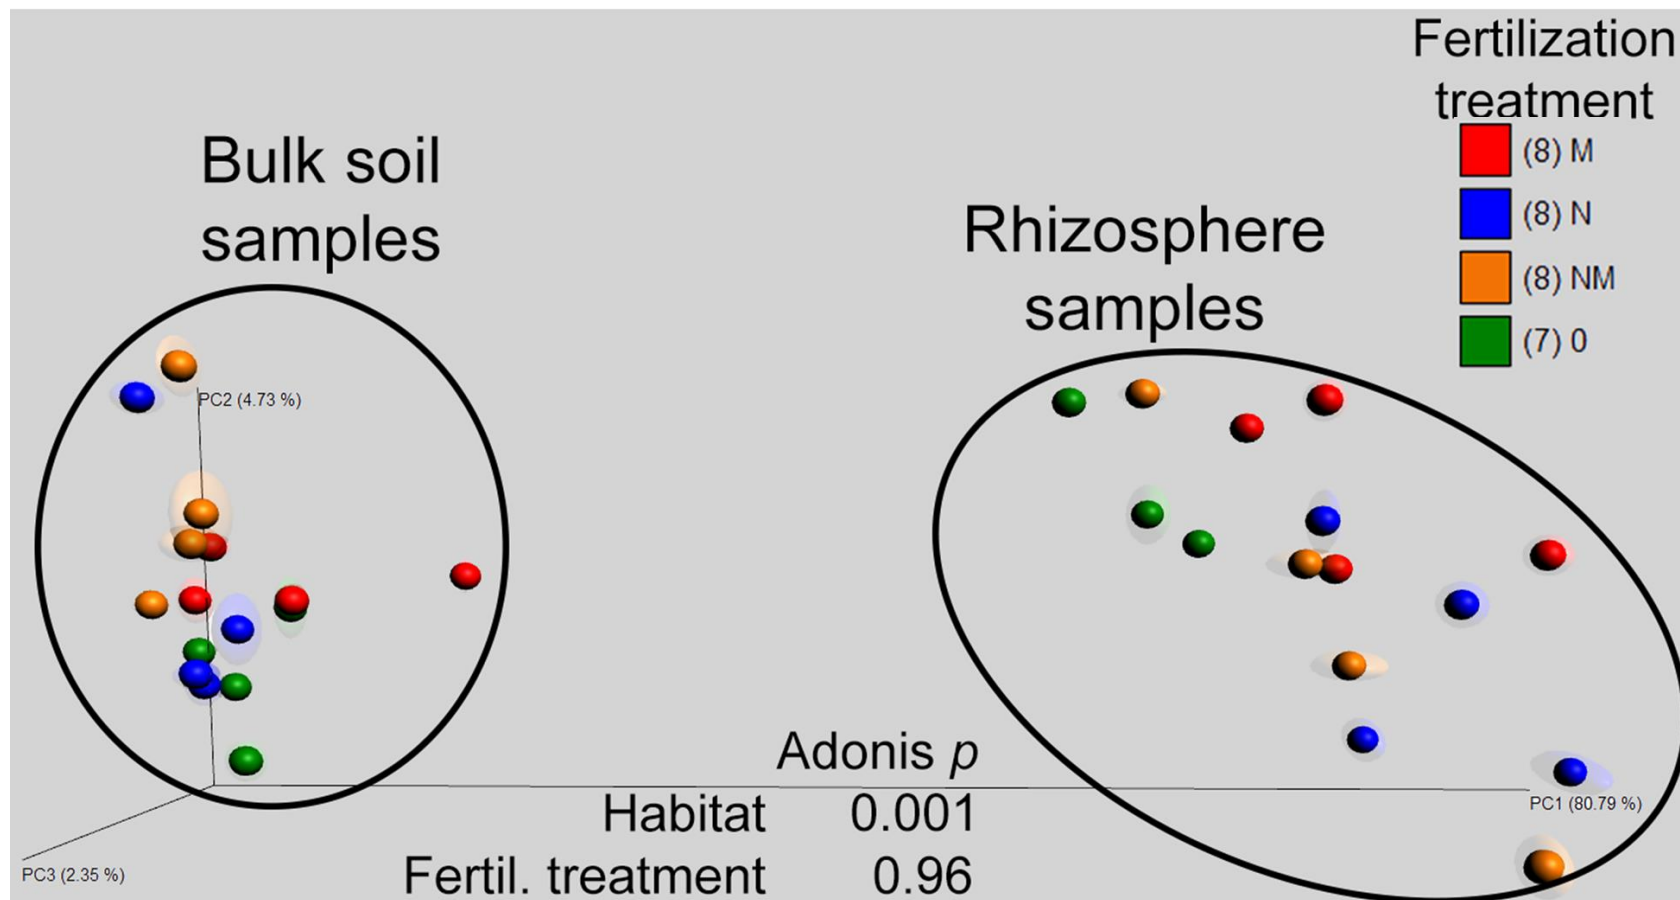

**Figure S2. Beta-diversity plot of the soil bacterial microbiota, calculated at OTU<sub>97</sub> level, in the two soil habitats, under the four N-fertilization treatments.** Plot is based on weighted Unifrac distances, showing the similarity of the microbiota structure of all soil samples. Adonis  $p$  values for the factors “habitat” and “fertilization treatment” are indicated. Fertilization treatments: N, mineral-N; M, manure; NM, mineral-N + manure; 0, no N-amendment.

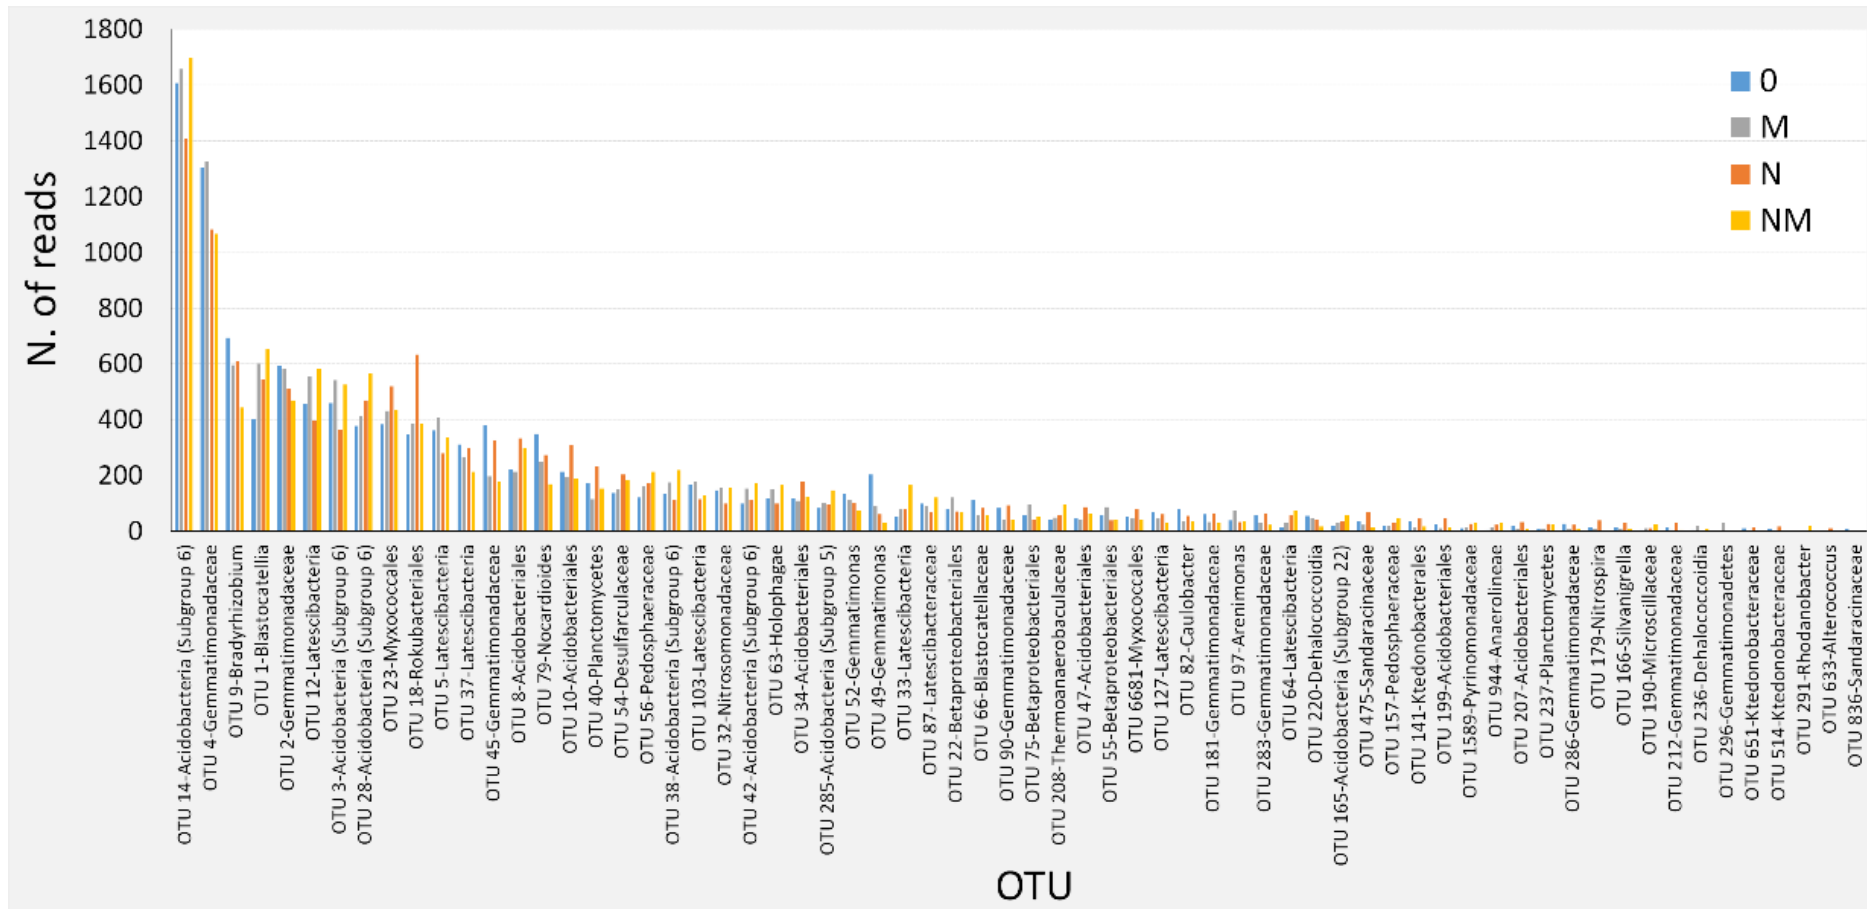

**Figure. S3 OTUs significantly affected by fertilization treatment in the bulk soil.** Significance was assessed by g-test of independence (FDR-corrected  $p < 0.05$ ). Treatments: 0, no N-amendment; N, mineral-N amendment; M, manure amendment; NM, mineral-N + manure amendment.

**Table S1 Details of the fertilization treatments.** The types of mineral fertilizers applied were: Mineral-N: lime ammonium nitrate (27% N); Phosphate: triple superphosphate (46% P<sub>2</sub>O<sub>5</sub>); Potassium: granule potassium (60% K<sub>2</sub>O)

| Treatment name | Nutrients |        |           |           |
|----------------|-----------|--------|-----------|-----------|
|                | Mineral-N | Manure | Phosphate | Potassium |
| N              | 100%      | 0%     | 100%      | 100%      |
| M              | 0%        | 100%   | 100%      | 100%      |
| NM             | 100%      | 100%   | 100%      | 100%      |
| 0              | 0%        | 0%     | 100%      | 100%      |

**Table S2 Thermal profiles and primers used for qPCR.** All qPCRs reactions started with an initial denaturation step at 95 °C for 15 min and ended with a final elongation step at 72 °C for 3 min. For the acquisition of the fluorescence signal an addition step of 80 °C were performed after the elongation step.

| Target gene           | Primer names            | Primer [ $\mu$ M] | BSA [ $\mu$ g $\mu$ l <sup>-1</sup> ] | Program                             | Cycles | Source standard DNA             | Literature                                          |
|-----------------------|-------------------------|-------------------|---------------------------------------|-------------------------------------|--------|---------------------------------|-----------------------------------------------------|
| 16S rRNA              | 520F<br>926R comp       | 0.8/0.6           | 0.2                                   | 95 °C/45 s, 55 °C/45 s, 72 °C/60 s  | 40     | Environmental clone             | Claesson et al., 2009<br>Engelbrektson et al., 2010 |
| <i>nirk</i>           | nirk876<br>nirk5R       | 0.25/0.5          | 0.5                                   | 95 °C/20 s, 63 °C/25 s, 72 °C/20 s  | 40     | <i>Bradyrhizobium japonicum</i> | Henry et al., 2004<br>Braker et al., 1998           |
| <i>nirS</i>           | cd3af<br>R3cd           | 0.25/0.5          | 0.5                                   | 95 °C/20 s, 63 °C/25 s, 72 °C/20 s  | 40     | <i>Cupriavidus necator</i>      | Throbäck et al., 2004                               |
| Bacterial <i>amoA</i> | amoA1F<br>amoA2R        | 0.25/0.25         | 0.2                                   | 95 °C/30 s, 59 °C/30 s, 72 °C/ 20 s | 35     | Environmental clone             | Rotthauwe et al., 1997                              |
| Archaeal <i>amoA</i>  | CamoA-19F<br>CamoA-616R | 0.25/0.5          | 0.5                                   | 95 °C/30 s, 64 °C/45 s, 72 °C/45 s  | 40     | Environmental clone             | Pester et al., 2012                                 |
| <i>nosZ-I</i>         | nosZ2F<br>nosZ2R        | 0.25/0.25         | -                                     | 95 °C/20 s, 63 °C/25 s, 72 °C/20 s  | 40     | <i>Pseudomonas fluorescens</i>  | Henry et al., 2006                                  |
| <i>nosZ-II</i>        | nosZ-II<br>nosZ-II-R    | 0.25/0.5          | -                                     | 95 °C/30 s, 63 °C/50 s, 72 °C/50 s  | 40     | Environmental clone             | Jones, 2013                                         |

### **Additional bibliography for Table S2**

- Braker, G., Fesefeldt, A., Witzel, K.P., 1998. Development of PCR primer systems for amplification of nitrite reductase genes (*nirK* and *nirS*) to detect denitrifying bacteria in environmental samples. *Appl. Environ. Microbiol.* 64 (10), 3769–3775.
- Henry, S., Baudoin, E., López-Gutiérrez, J.C., Martin-Laurent, F., Brauman, A., Philippot, L., 2004. Quantification of denitrifying bacteria in soils by *nirK* gene targeted real-time PCR. *J. Microbiol. Meth.* 59, 327–335. Corrigendum.
- Henry, S., Bru, D., Stres, B., Hallet, S., Philippot, L., 2006. Quantitative detection of the *nosZ* gene, encoding nitrous oxide reductase, and comparison of the abundances of 16S rRNA, *narG*, *nirK*, and *nosZ* genes in soils. *Appl. Environ. Microbiol.* 72 (8), 5181–5189.
- Jones, C.M., Graf, D.R.H., Bru, D., Philippot, L., Hallin, S., 2013. The unaccounted yet abundant nitrous oxide-reducing microbial community: A potential nitrous oxide sink. *ISME J.* 7 (2), 417–426. 10.1038/ismej.2012.125.
- Pester, M., Rattei, T., Flechl, S., Gröngroft, A., Richter, A., Overmann, J., Reinhold-Hurek, B., Loy, A., Wagner, M., 2012. *amoA*-based consensus phylogeny of ammonia-oxidizing archaea and deep sequencing of *amoA* genes from soils of four different geographic regions. *Environ. Microbiol.* 14 (2), 525–539.
- Rotthauwe, J.H., Witzel, K.P., Liesack, W., 1997. The ammonia monooxygenase structural gene *amoA* as a functional marker: Molecular fine-scale analysis of natural ammonia-oxidizing populations. *Appl. Environ. Microbiol.* 63 (12), 4704–4712.
- Throbäck, I.N., Enwall, K., Jarvis, A., Hallin, S., 2004. Reassessing PCR primers targeting *nirS*, *nirK* and *nosZ* genes for community surveys of denitrifying bacteria with DGGE. *FEMS Microbiol. Ecol.* 49, 401–417.
